# Supplementary material for: Assessing the Quality of Mortality Data in Zunyi, China: A Comparative Study of Garbage Coding Before and After Intervention
Source: Research Square preprint supplement (doi:10.21203/rs.3.rs-5377235/v1), 2024-12-18
Supplement: Supplementary file 1 [file 2c6495b71c5df8c493aba365.docx]

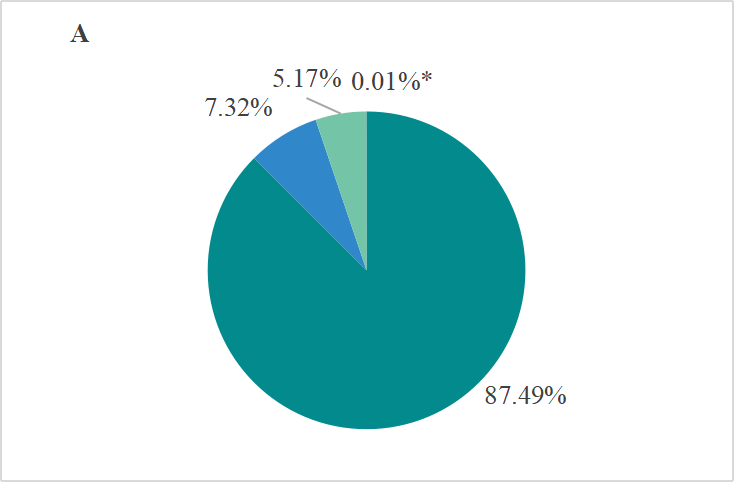

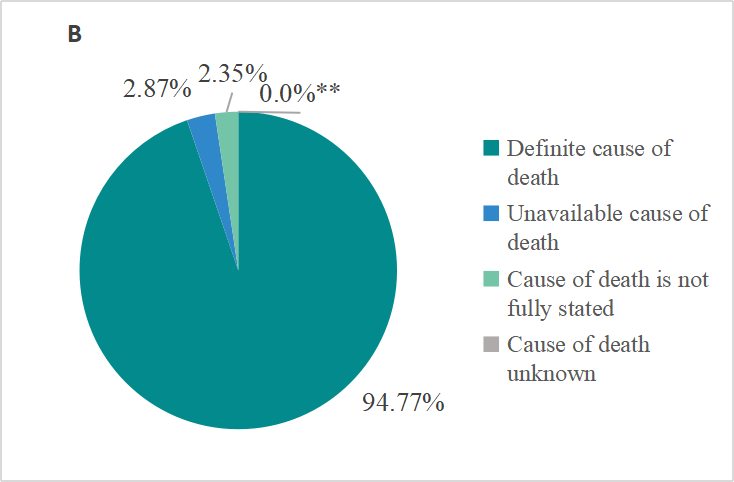


Note: *n=5; **n=2

Supplementary Figure 1 Distribution of different causes of death in the 2022 (A) and 2023 (B) death populations
